# Supplementary material for: Experimental and theoretical studies of the ancillary ligand (E)-2-((3-amino-pyridin-4-ylimino)-methyl)-4,6-di-tert-butylphenol in the rhenium(i) core
Source: Royal Society of Chemistry journal article supplement (doi:10.1039/c5nj00772k), 2015-01-01
Supplement: c5nj00772k2.pdf [file c5nj00772k2.pdf]

## Supplementary Information

### Experimental and Theoretical Studies of the ancillary ligand (*E*)-2-((3-amino-pyridin-4-ylimino)-methyl)-4,6-diterbutylphenol in Rhenium(I) core

Alexander Carreño<sup>1,10\*</sup>, Manuel Gacitua<sup>2</sup>, Eduardo Schott<sup>3</sup>, Ximena Zarate<sup>4</sup>, Juan Manuel Manriquez<sup>3</sup>,  
Marcelo Preite<sup>5</sup>, Sonia Ladeira<sup>6</sup>, Annie Castel<sup>6</sup>, Nancy Pizarro<sup>7</sup>, Andrés Vega<sup>7,8</sup>, Ivonne Chavez<sup>9</sup>,  
Ramiro Arratia-Perez<sup>1,10</sup>

<sup>1</sup>Doctorado en Fisicoquímica Molecular, Center of Applied Nanosciences (CENAP), Universidad Andres Bello, Ave. Republica 275, Santiago, Chile, Zip Code: 8370146.

<sup>2</sup>Departamento de Química Inorgánica, Facultad de Química, Pontificia Universidad Católica de Chile. Current address: Center of Applied Ecology and Sustainability (CAPES), Universidad Adolfo Ibáñez, Peñalolén, Chile

<sup>3</sup>Laboratorio de Bionanotecnología, Universidad Bernardo O'Higgins, General Gana 1702, Santiago, Chile.

<sup>4</sup>Dirección de Postgrado e Investigación, Universidad Autónoma de Chile, Av. Pedro de Valdivia 641, Santiago, Chile.

<sup>5</sup>Departamento de Química Orgánica, Facultad de Química, Pontificia Universidad Católica de Chile.

<sup>6</sup>Université Paul Sabatier, Institut de Chimie de Toulouse (FR 2599), 118 route de Narbonne, 31062 Toulouse cedex 9, France.

<sup>7</sup>Departamento de Ciencias Químicas, Facultad de Ciencias Exactas, Universidad Andres Bello.

<sup>8</sup>Centro para el Desarrollo de la Nanociencia y la Nanotecnología, CEDENNA

<sup>9</sup>Departamento de Química Inorgánica, Facultad de Química, Pontificia Universidad Católica de Chile.

<sup>10</sup>Núcleo Milenio de Ingeniería Molecular para Catálisis y Biosensores, ICM

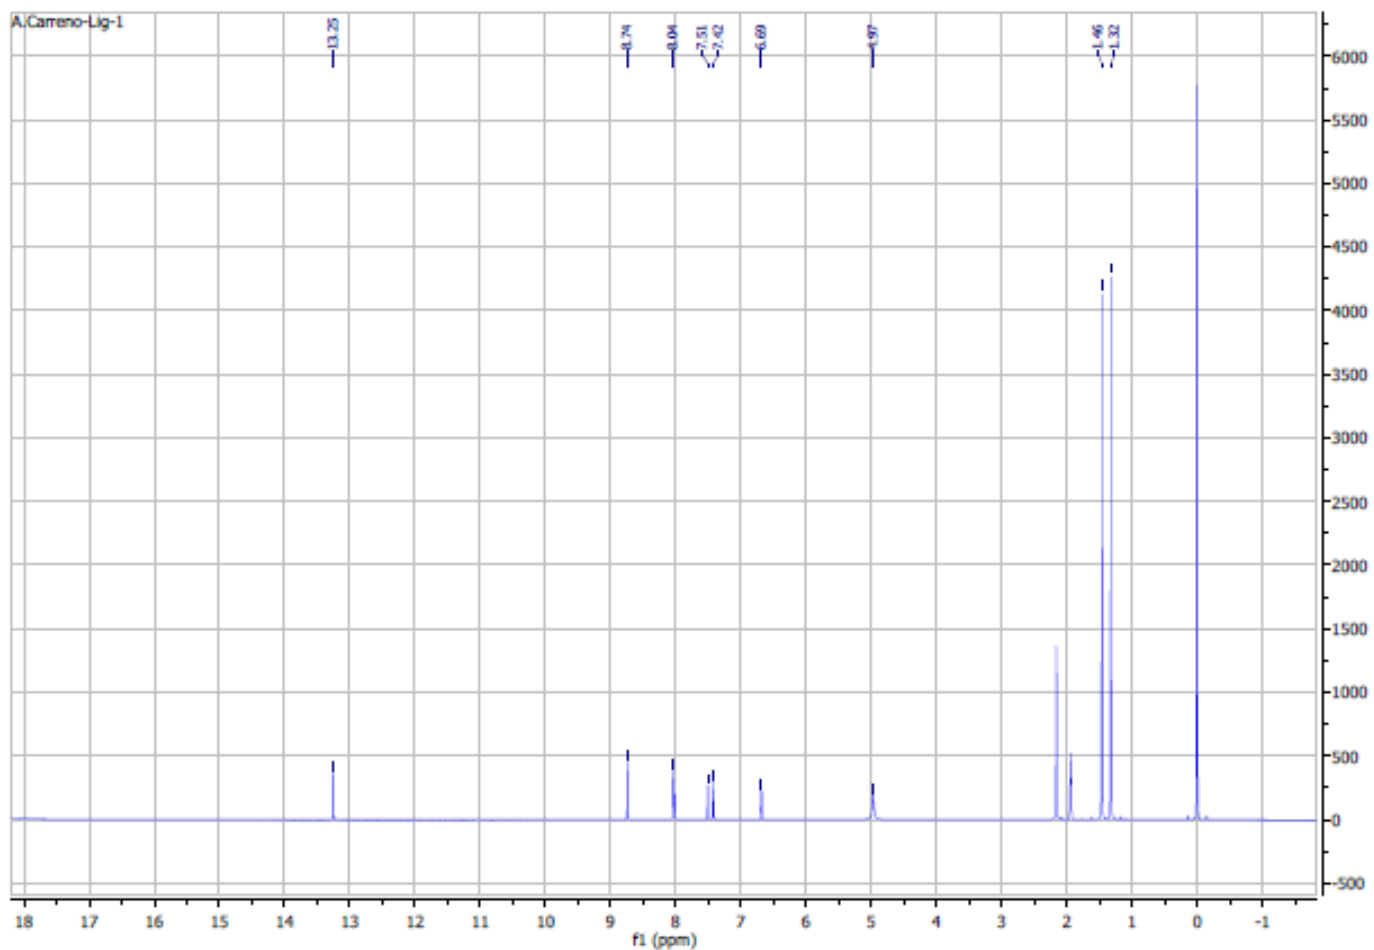

**Figure S1.**  $^1\text{H}$ NMR spectra of **L** in acetonitrile deuterated.

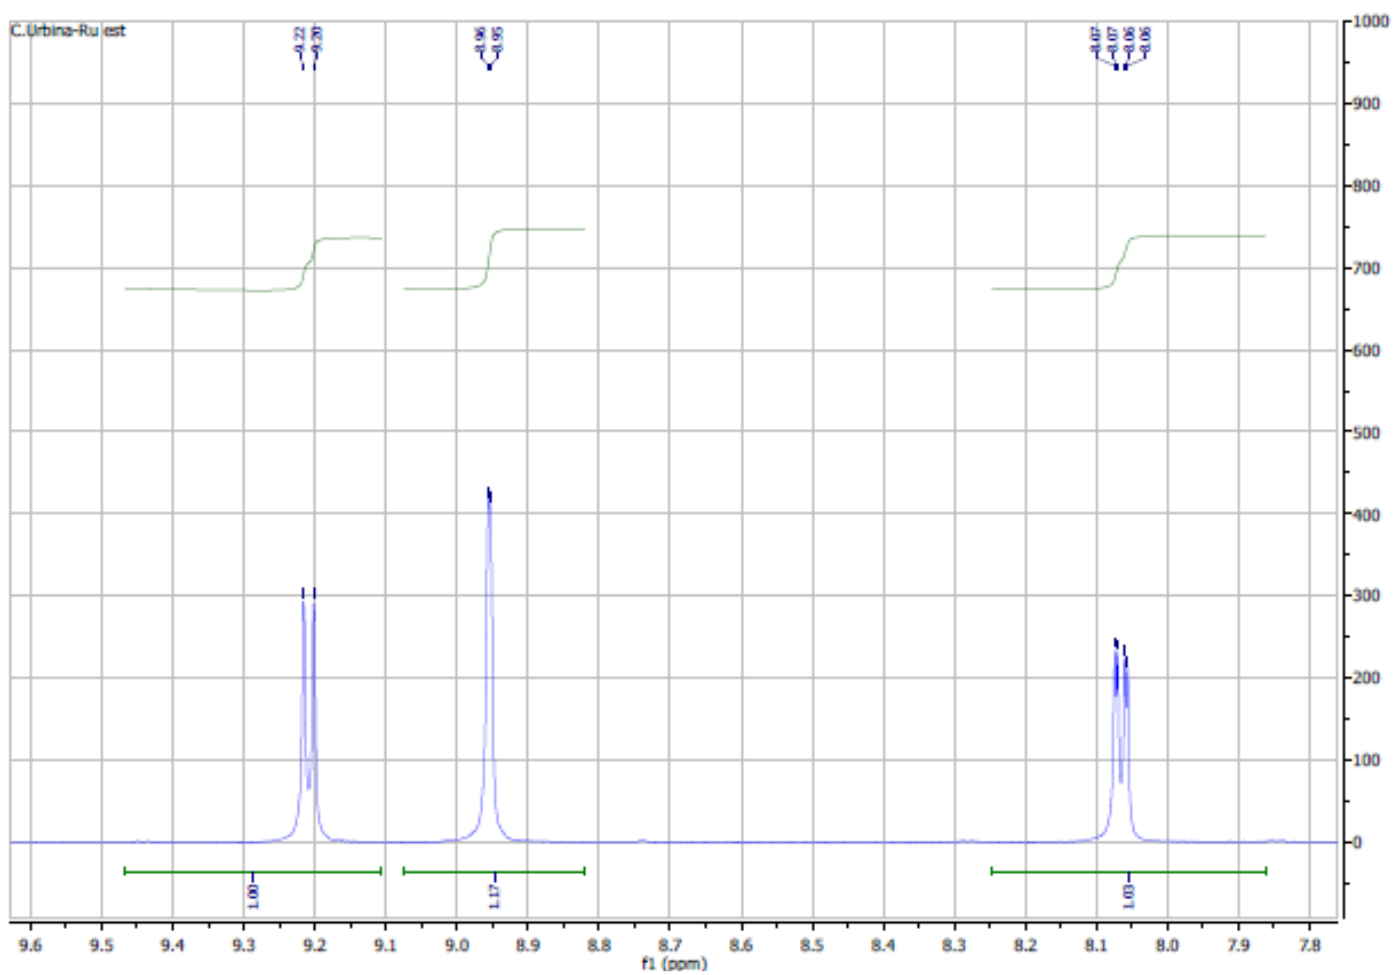

Figure S2.  $^1\text{H}$ NMR of C1 in acetonitrile deuterated.

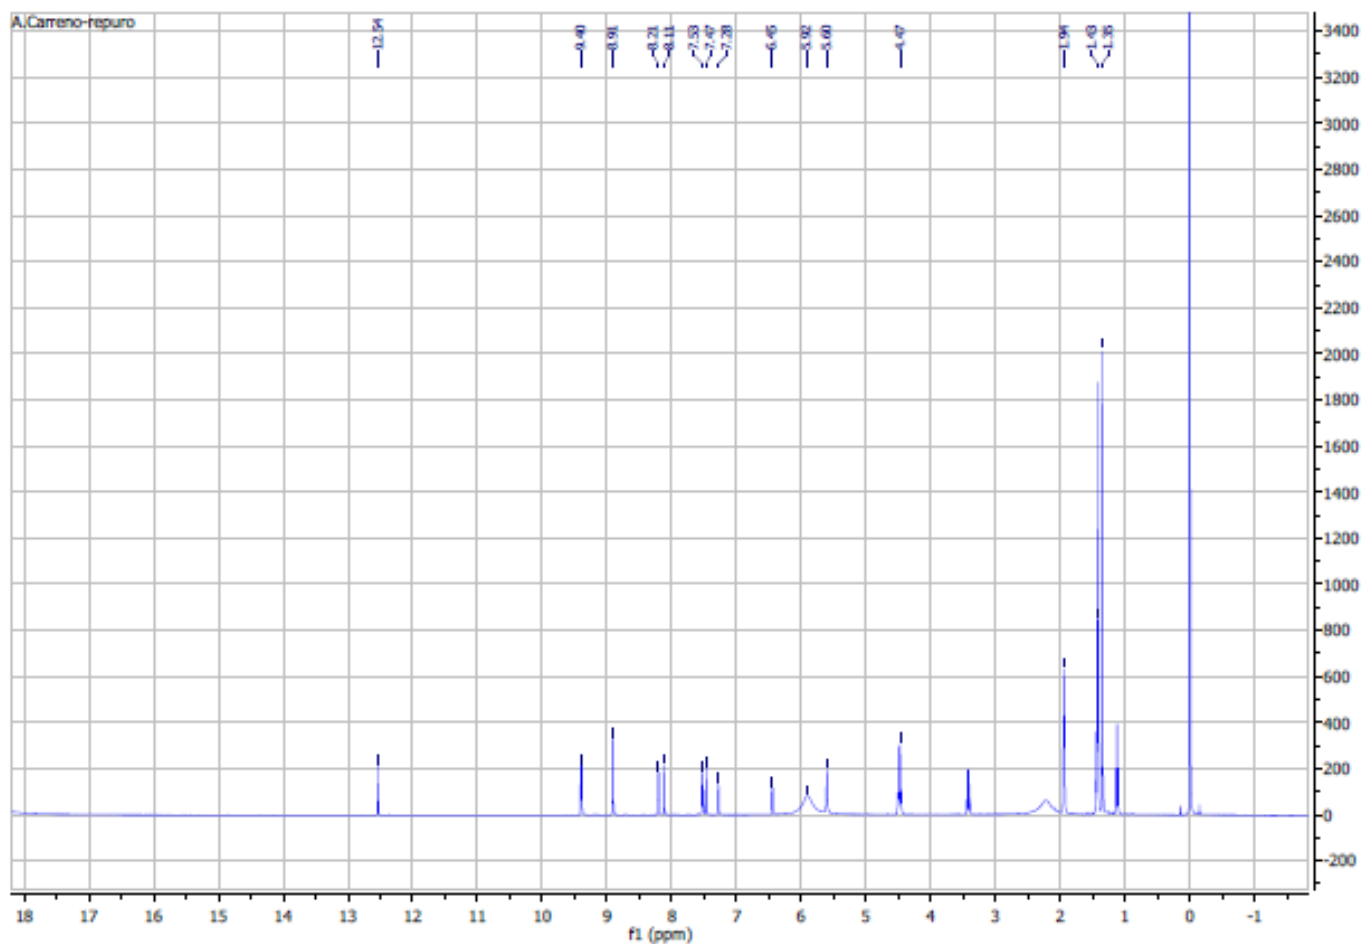

**Figure S3.**  $^1\text{H}$ NMR of C2 in acetonitrile deuterated.

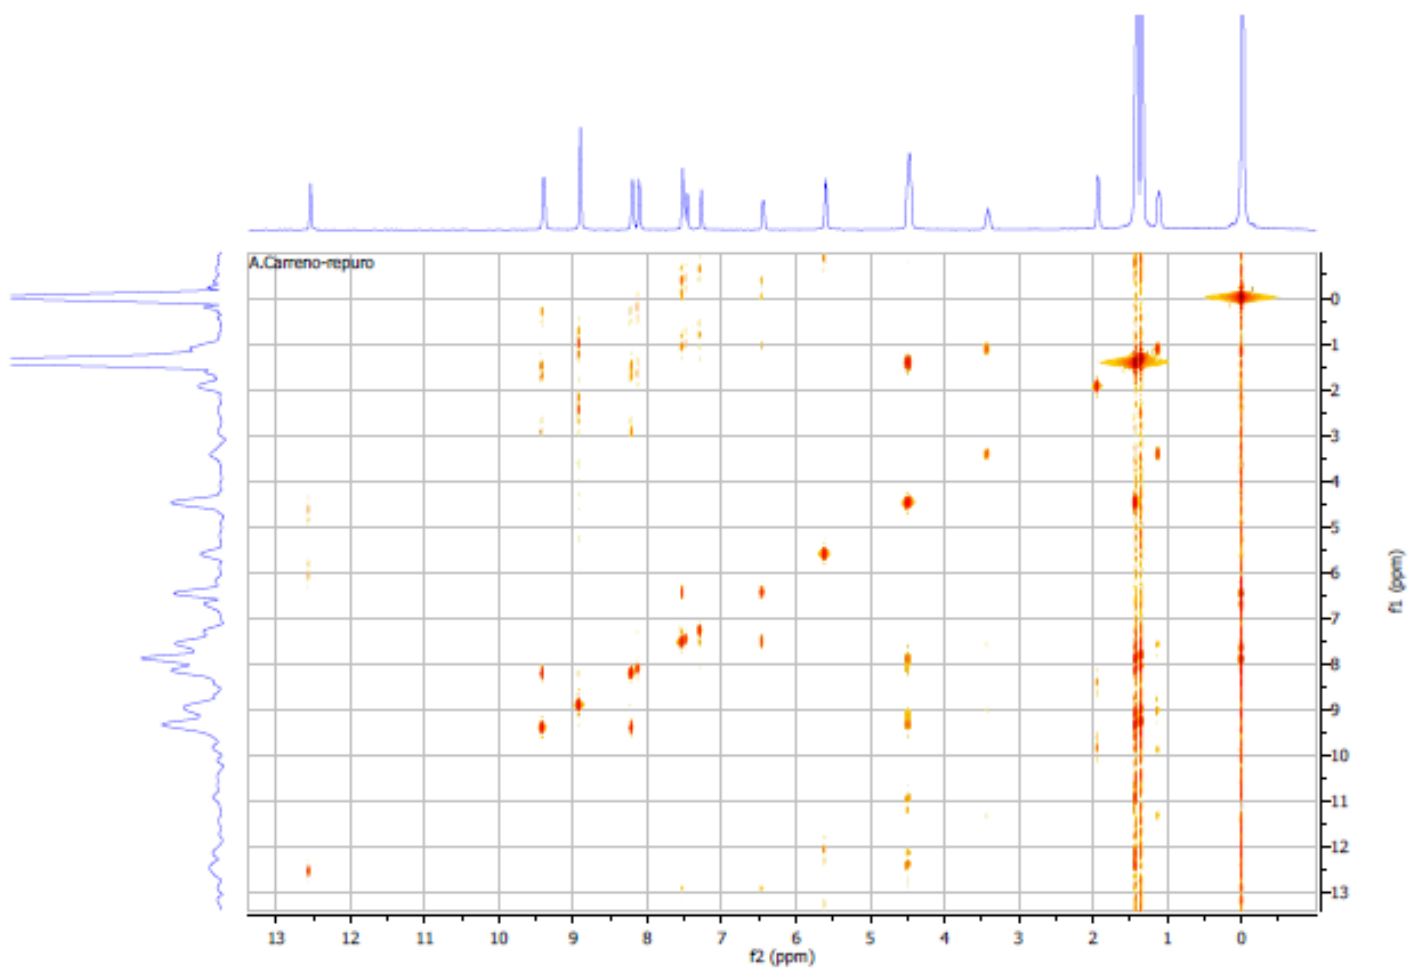

**Figure S4.** HHCOSY of C2 in acetonitrile deuterated.

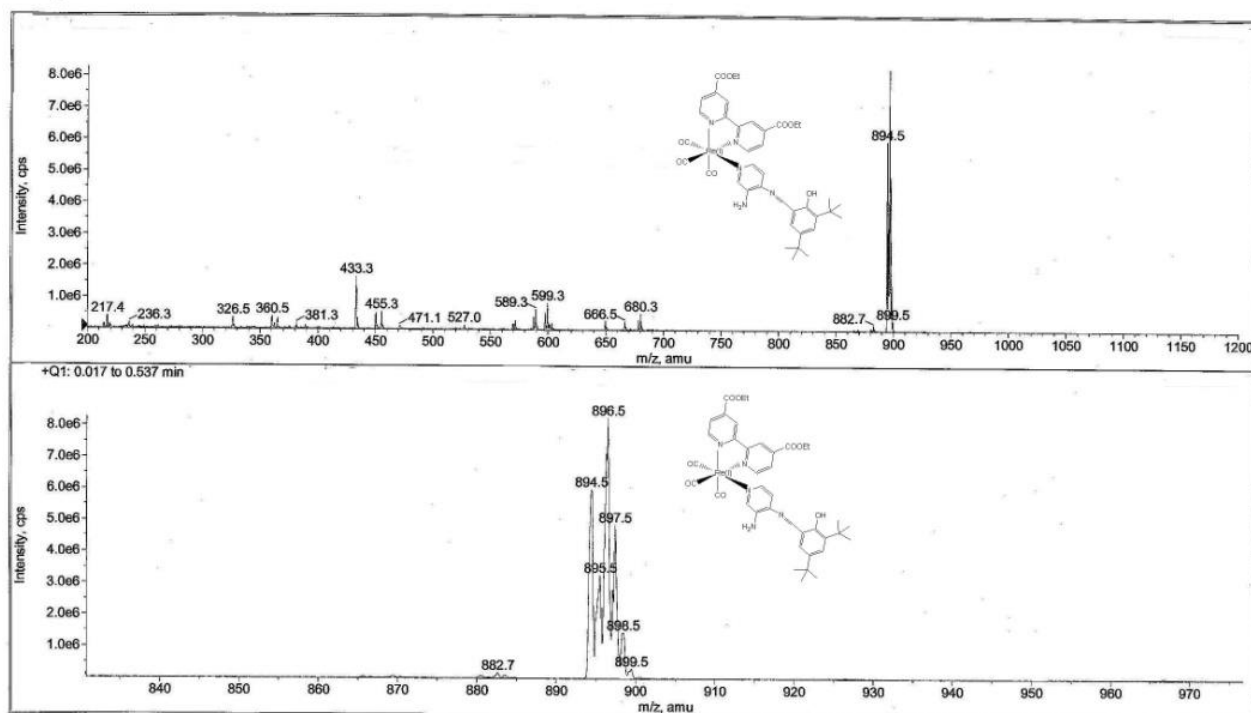

Figure S5. Mass spectra of C2.

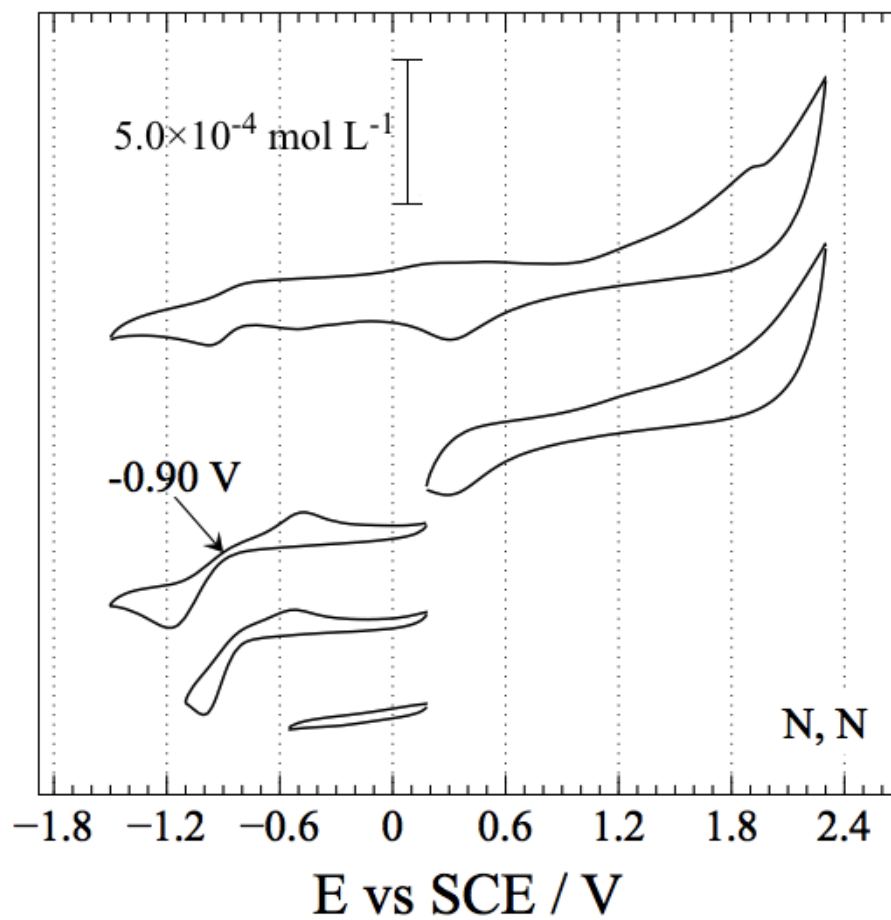

**Figure S6.** CV working-window study of **deeb**. Interface: Interface: Pt |  $1.0 \times 10^{-5}$  M of analyte +  $1.0 \times 10^{-4}$  M TBAPF<sub>6</sub> in anhydrous CH<sub>3</sub>CN under an argon atmosphere.

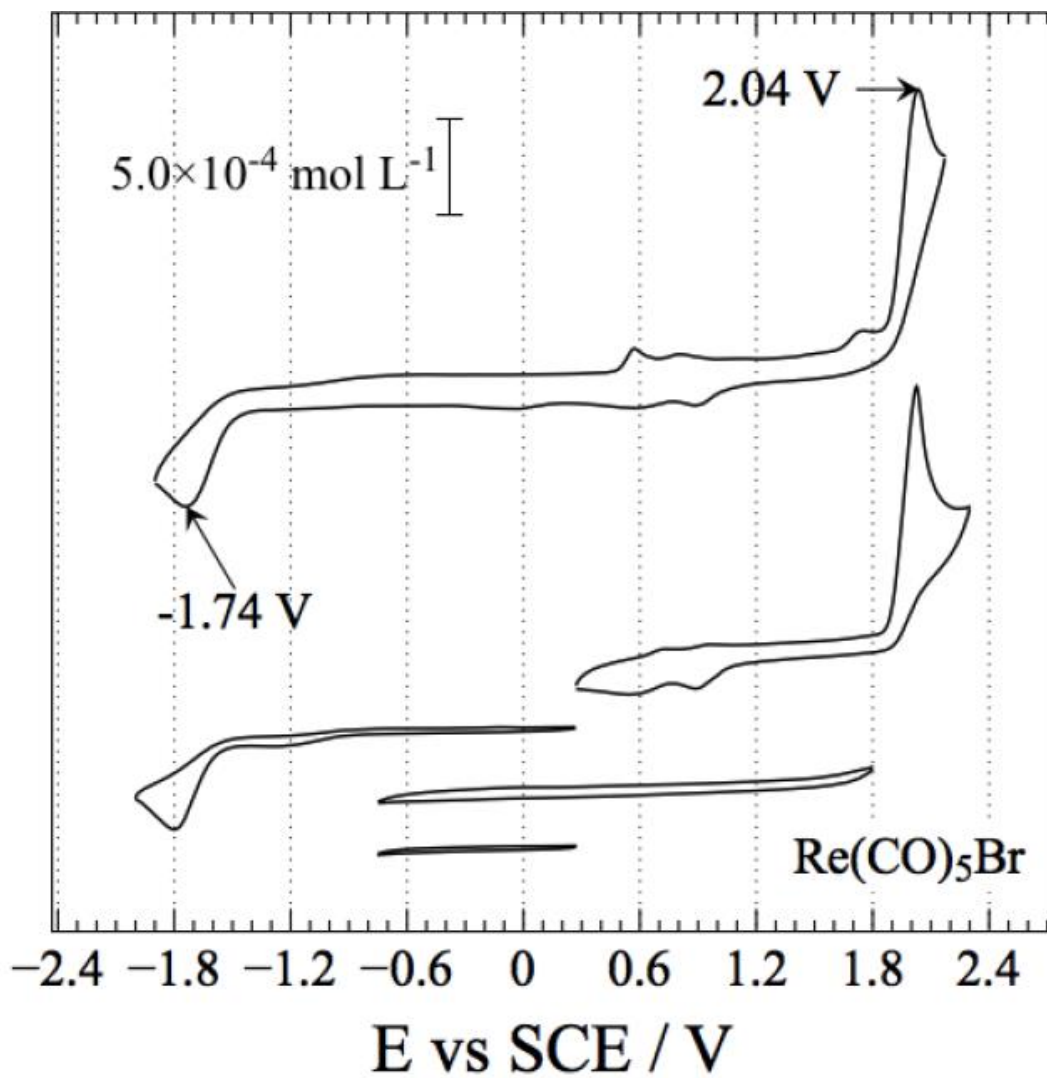

**Figure S7.** CV working-window study of  $\text{Re}(\text{CO})_5\text{Br}$ . Interface: Interface: Pt |  $1.0 \times 10^{-5} \text{ M}$  of analyte +  $1.0 \times 10^{-4} \text{ M}$  TBAPF<sub>6</sub> in anhydrous CH<sub>3</sub>CN under an argon atmosphere.



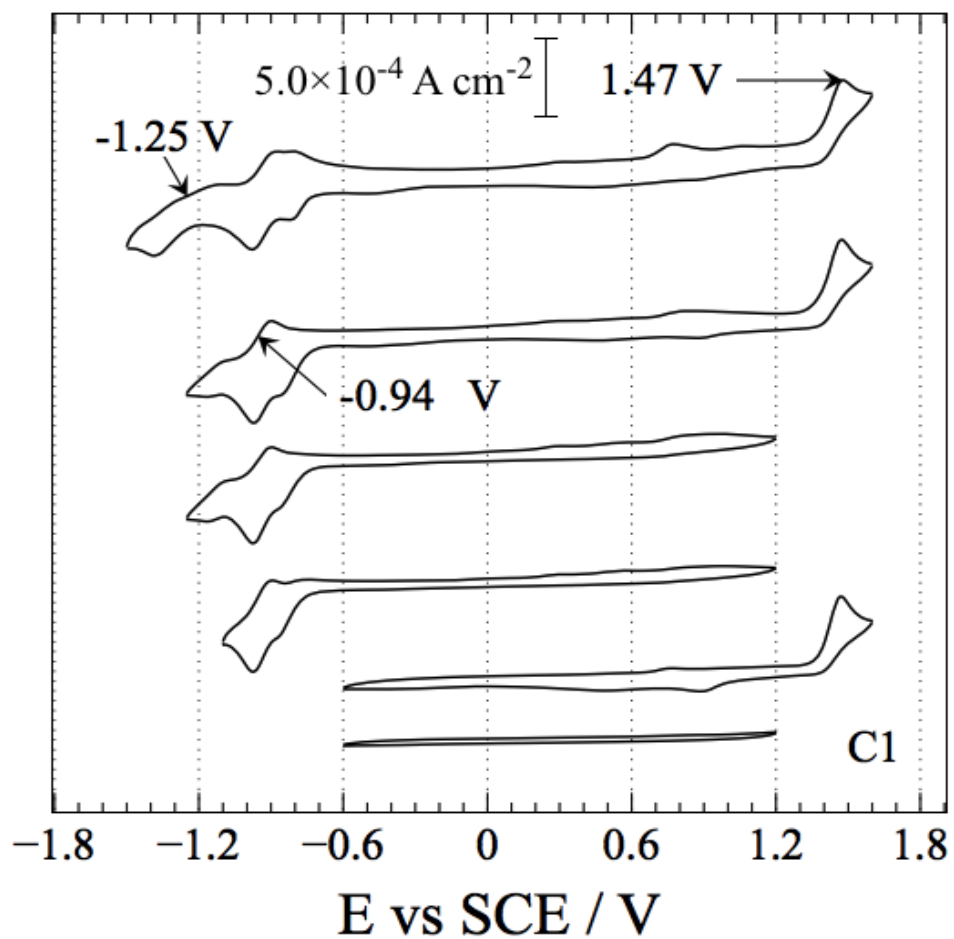

**Figure S8.** CV working-window study of **C1**. Interface: Interface: Pt |  $1.0 \times 10^{-5} \text{ M}$  of analyte +  $1.0 \times 10^{-4} \text{ M}$  TBAPF<sub>6</sub> in anhydrous CH<sub>3</sub>CN under an argon atmosphere.

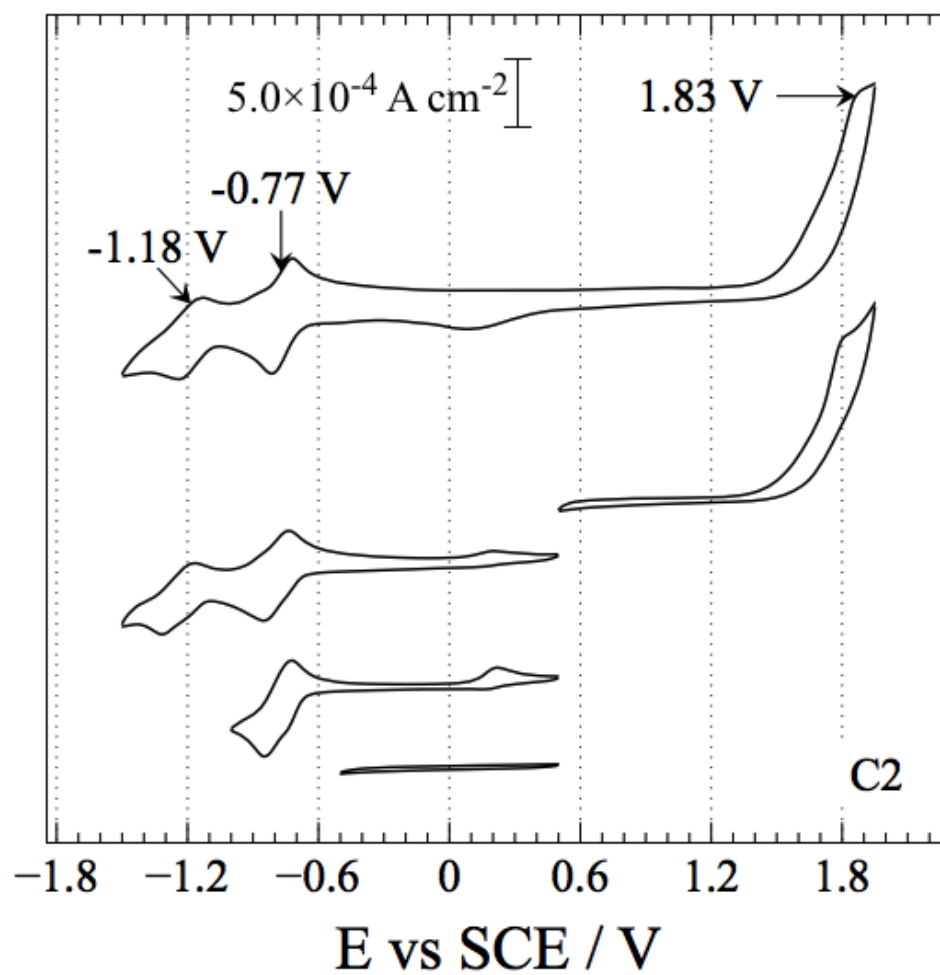

**Figure S9.** CV working-window study of **C2**. Interface: Interface: Pt |  $1.0 \times 10^{-5}$  M of analyte +  $1.0 \times 10^{-4}$  M TBAPF<sub>6</sub> in anhydrous CH<sub>3</sub>CN under an argon atmosphere.

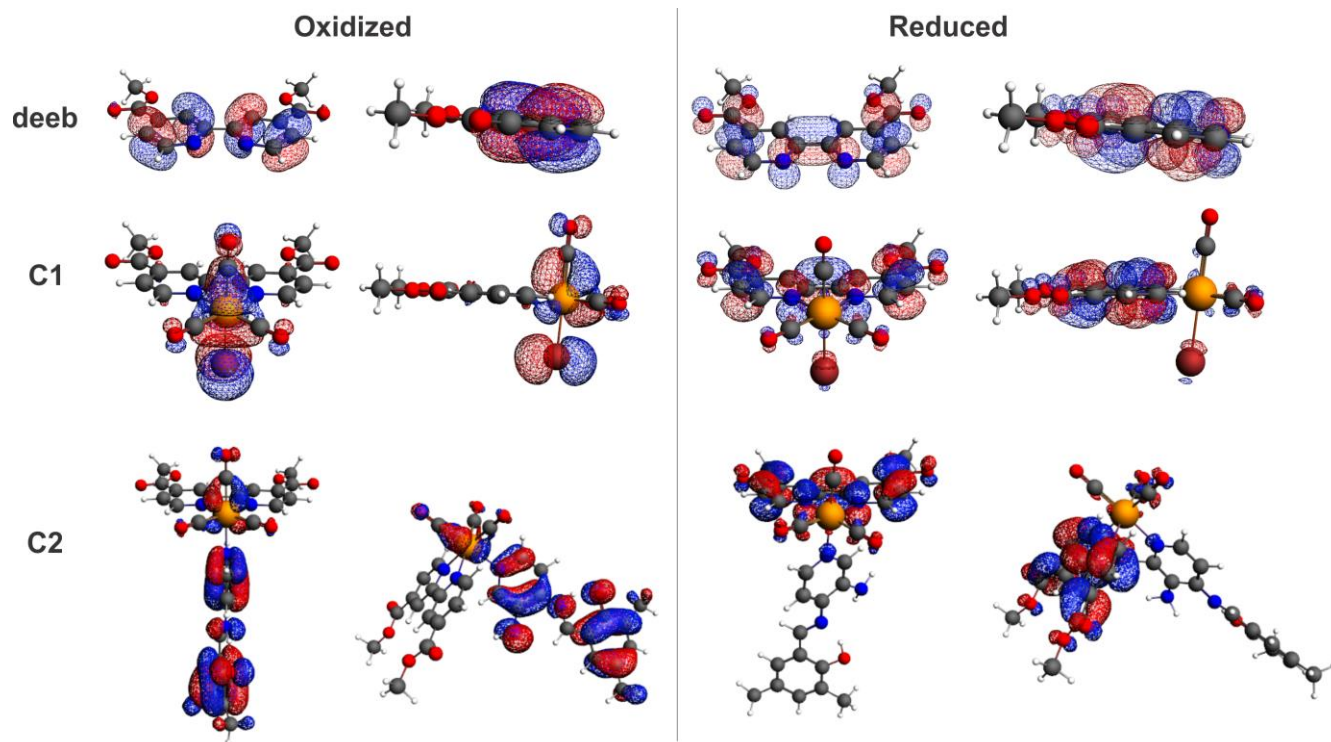

**Figure S10.** Two sides of view of the highest occupied orbitals of the oxidized and reduced states for deeb, C1 and C2.

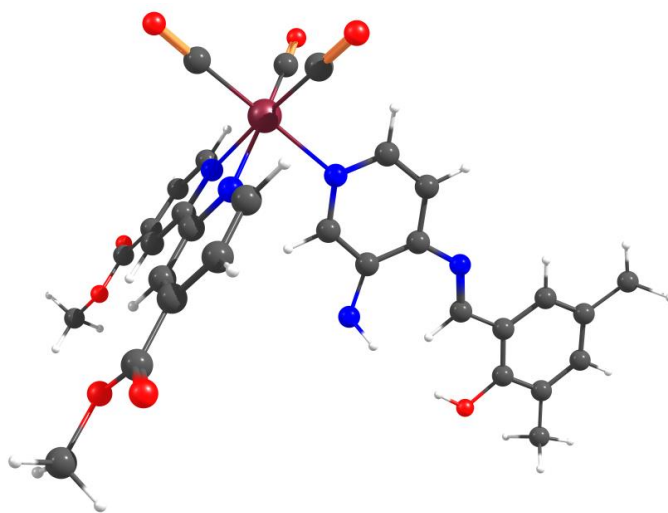

**Figure S11.** Optimized structure of C2 without the hydrogen bond in the L.

**Table S1.** Composition in percentage (%) of the frontier molecular orbitals for C1. The HOMO is indicated in bold.

| Orb.                            | C≡O | Br | Re | deeb |
|---------------------------------|-----|----|----|------|
| 80 $\gamma$ 1/2                 | 0   | 0  | 0  | 100  |
| 79 $\gamma$ 1/2                 | 0   | 0  | 0  | 100  |
| 78 $\gamma$ 1/2                 | 3   | 3  | 4  | 90   |
| <b>77<math>\gamma</math>1/2</b> | 37  | 48 | 11 | 0    |
| 76 $\gamma$ 1/2                 | 9   | 75 | 16 | 0    |
| 75 $\gamma$ 1/2                 | 29  | 9  | 60 | 2    |
| 64 $\gamma$ 1/2                 | 1   | 0  | 2  | 97   |

**Table S2.** Composition in percentage (%) of the frontier molecular orbitals for C2. The HOMO is indicated in bold.

| Orb.                             | C≡O | L   | Re | deeb |
|----------------------------------|-----|-----|----|------|
| 130 $\gamma$ 1/2                 | 100 | 0   | 0  | 0    |
| 126 $\gamma$ 1/2                 | 14  | 48  | 4  | 34   |
| 123 $\gamma$ 1/2                 | 1   | 99  | 0  | 0    |
| 121 $\gamma$ 1/2                 | 0   | 0   | 0  | 100  |
| 120 $\gamma$ 1/2                 | 4   | 0   | 3  | 94   |
| <b>119<math>\gamma</math>1/2</b> | 0   | 100 | 0  | 0    |
| 118 $\gamma$ 1/2                 | 9   | 88  | 3  | 0    |
| 116 $\gamma$ 1/2                 | 6   | 76  | 18 | 0    |
| 114 $\gamma$ 1/2                 | 30  | 4   | 65 | 2    |
| 111 $\gamma$ 1/2                 | 0   | 100 | 0  | 0    |
